# Supplementary material
Source: Research Square preprint supplement (doi:10.21203/rs.3.rs-10089247/v1)
Supplement: Supplementary file 1 [file 1dc906940a5953375d3811cd.docx]

**Supplementary information**

**Table S1** Effects of larvicide treatments on tadpole survival based on Cox proportional hazards models. Hazard ratios are shown relative to the control treatment. Bold indicates significant treatments.

| **Larvicide** | **β** | **Hazard ratio** | **SE** | **z** | ***P*** |
| --- | --- | --- | --- | --- | --- |
| Bti | -0.64 | 0.53 | 0.56 | -1.15 | 0.25 |
| **Larvicidal oil** | **2.13** | **8.44** | **0.41** | **5.18** | **<0.001** |
| Temephos | -0.58 | 0.56 | 0.54 | -1.09 | 0.28 |

**Table S2** Results of the linear mixed-effects model examining the effects of three larvicide treatments (*Bacillus thuringiensis israelensis* [Bti], larvicidal oil, and temephos), days since treatment, and their interaction on *Liuixalus romeri* tadpole body length at minimum recommended rates. Control is set as the default reference treatment. Bold indicates significant factors.

| **Factors** | **Estimate** | **SE** | **t** | **P** |
| --- | --- | --- | --- | --- |
| Bti | -0.005 | 0.069 | -0.073 | 0.942 |
| Larvicidal oil | -0.083 | 0.069 | -1.147 | 0.253 |
| Temephos | -0.105 | 0.072 | -1.532 | 0.128 |
| **Time** | **0.013** | **0.002** | **6.158** | **<0.001** |
| Bti x Time | 0.004 | 0.003 | 1.363 | 0.175 |
| **Larvicidal oil x Time** | **-0.010** | **0.004** | **-2.647** | **0.009** |
| Temephos x Time | 0.002 | 0.003 | 0.819 | 0.414 |

**Table S3** Pairwise comparisons of daily proportional growth rates of *Liuixalus romeri* tadpoles among mosquito larvicide treatments under exposure to minimum recommended rates, estimated using marginal trends from the linear mixed-effects model. Bold indicates significant comparisons.

| **Comparison** | **Estimate** | **SE** | **t** | **P** |
| --- | --- | --- | --- | --- |
| Control vs Bti | -0.004 | 0.003 | -1.356 | 0.529 |
| **Control vs Larvicidal oil** | **0.010** | **0.004** | **2.615** | **0.048** |
| Control vs Temephos | -0.002 | 0.003 | -0.817 | 0.846 |
| **Bti vs Larvicidal oil** | **0.014** | **0.004** | **3.721** | **0.002** |
| Bti vs Temephos | 0.002 | 0.003 | 0.592 | 0.934 |
| **Larvicidal oil vs Temephos** | **-0.012** | **0.004** | **-3.339** | **0.006** |

**Table S4** Results of mixed-effects models testing the effects of mosquito larvicide treatment, time, and their interaction on movement parameters of *Liuixalus romeri* tadpoles during early (day 4–11) and full (day 4–32) exposure periods.

| **Parameter** | **Factors** | **F or χ2** | **P** |
| --- | --- | --- | --- |
| ***Early period*** |  |  |  |
| Average speed | **Larvicide** | **3.943** | **0.013** |
|  | Time | 2.782 | 0.101 |
|  | **Larvicide x Time** | **4.828** | **0.005** |
| Mobile average speed | **Larvicide** | **5.147** | **0.003** |
|  | Time | 2.499 | 0.119 |
|  | **Larvicide x Time** | **4.715** | **0.005** |
| Average acceleration | **Larvicide** | **6.051** | **0.001** |
|  | Time | 0.387 | 0.538 |
|  | **Larvicide x Time** | **4.359** | **0.008** |
| Mobility rate | Larvicide | 4.210 | 0.240 |
|  | Time | 1.809 | 0.179 |
|  | Larvicide x Time | 7.492 | 0.058 |
| Exploration rate | Larvicide | 6.039 | 0.110 |
|  | Time | 1.042 | 0.307 |
|  | **Larvicide x Time** | **15.966** | **0.001** |
| Frozen events | Larvicide | 0.951 | 0.460 |
|  | Time | 0.087 | 0.770 |
|  | Larvicide x Time | 1.480 | 0.231 |
| ***Full period*** |  |  |  |
| Average speed | Larvicide | 1.054 | 0.352 |
|  | **Time** | **7.812** | **<0.001** |
|  | **Larvicide x Time** | **2.180** | **0.035** |
| Mobile average speed | Larvicide | 1.647 | 0.264 |
|  | **Time** | **4.870** | **0.001** |
|  | **Larvicide x Time** | **2.353** | **0.023** |
| Average acceleration | Larvicide | 0.758 | 0.471 |
|  | **Time** | **7.726** | **<0.001** |
|  | **Larvicide x Time** | **2.402** | **0.020** |
| Mobility rate | Larvicide | 0.935 | 0.627 |
|  | Time | 8.106 | 0.088 |
|  | Larvicide x Time | 14.938 | 0.060 |
| Exploration rate | **Larvicide** | **11.659** | **0.003** |
|  | **Time** | **19.129** | **0.001** |
|  | **Larvicide x Time** | **28.056** | **<0.001** |
| Frozen events | Larvicide | 1.046 | 0.355 |
|  | **Time** | **11.002** | **<0.001** |
|  | Larvicide x Time | 1.002 | 0.439 |

**Table S5** Results of post-hoc pairwise comparisons derived from mixed-effects models examining the effects of larvicide treatment on movement parameters of *Liuixalus romeri* tadpoles across time. Only statistically significant comparisons (p < 0.05) are presented. Analyses were conducted separately for the early period (Day 4–11) and the full period (Day 4–32). *For proportional parameters, estimates are odds ratios from beta regression models with a logit link. For continuous parameters, estimates are pairwise differences on the log-transformed response scale.

| **Parameter** | **Comparison** | **Day since treatment** | **Estimate*** | **SE** | **t or z** | **P** |
| --- | --- | --- | --- | --- | --- | --- |
| ***Early period*** |  |  |  |  |  |  |
| Average acceleration | Oil vs Bti | 11 | -2.187 | 0.451 | -4.851 | <0.001 |
| Average acceleration | Temephos vs Oil | 11 | 1.463 | 0.437 | 3.335 | 0.013 |
| Average speed | Oil vs Bti | 11 | -2.265 | 0.497 | -4.557 | <0.001 |
| Average speed | Temephos vs Oil | 11 | 1.634 | 0.482 | 3.390 | 0.011 |
| Mobile average speed | Oil vs Control | 11 | -1.429 | 0.523 | -2.734 | 0.048 |
| Mobile average speed | Oil vs Bti | 11 | -2.312 | 0.481 | -4.809 | <0.001 |
| Mobile average speed | Temephos vs Oil | 11 | 1.621 | 0.466 | 3.476 | 0.009 |
| Exploration rate | Bti vs Control | 11 | 2.765 | 1.063 | 2.645 | 0.041 |
| Exploration rate | Oil vs Bti | 11 | 0.124 | 0.050 | -5.150 | <0.001 |
| Exploration rate | Temephos vs Oil | 11 | 4.589 | 1.883 | 3.715 | 0.001 |
| Mobility rate | Bti vs Control | 11 | 2.335 | 0.709 | 2.793 | 0.027 |
| Mobility rate | Temephos vs Control | 11 | 2.575 | 0.765 | 3.186 | 0.008 |
| ***Full period*** |  |  |  |  |  |  |
| Average acceleration | Temephos vs Bti | 18 | 1.289 | 0.492 | 2.622 | 0.029 |
| Mobile average speed | Temephos vs Bti | 18 | 1.344 | 0.546 | 2.463 | 0.043 |
| Mobile average speed | Bti vs Control | 25 | -1.44 | 0.563 | -2.56 | 0.034 |
| Exploration rate | Bti vs Control | 18 | 0.364 | 0.143 | -2.565 | 0.028 |
| Exploration rate | Temephos vs Control | 18 | 3.197 | 1.324 | 2.806 | 0.014 |
| Exploration rate | Temephos vs Bti | 18 | 3.163 | 1.263 | 2.884 | 0.011 |

**Table S6** Results of mixed-effects models, with and without body size included as a fixed effect, testing the effects of mosquito larvicide treatment, time, and their interaction on movement parameters of *Liuixalus romeri* tadpoles during the early exposure period (Days 4–11) and full exposure period (Days 4–32). Bold text indicates statistically significant effects.

| **Parameter** | **Factors** | **P (without body size)** | **P (with body size)** |
| --- | --- | --- | --- |
| ***Early period*** |  |  |  |
| Average speed | Larvicide | **0.013** | 0.053 |
| Average speed | Larvicide x Time | **0.005** | **0.002** |
| Mobile average speed | Larvicide | **0.003** | **0.039** |
| Mobile average speed | Larvicide x Time | **0.005** | **0.003** |
| Average acceleration | Larvicide | **0.001** | **0.038** |
| Average acceleration | Larvicide x Time | **0.008** | **0.005** |
| Frozen events | Larvicide | 0.460 | 0.503 |
| Frozen events | Larvicide x Time | 0.231 | 0.239 |
| Mobility rate | Larvicide | 0.240 | 0.287 |
| Mobility rate | Larvicide x Time | 0.058 | 0.058 |
| Exploration rate | Larvicide | 0.110 | 0.149 |
| Exploration rate | Larvicide x Time | **0.001** | **0.001** |
| **Full period** |  |  |  |
| Average speed | Larvicide | 0.352 | 0.461 |
| Average speed | Larvicide x Time | **0.035** | **0.044** |
| Mobile average speed | Larvicide | 0.264 | 0.154 |
| Mobile average speed | Larvicide x Time | **0.023** | **0.019** |
| Average acceleration | Larvicide | 0.471 | 0.521 |
| Average acceleration | Larvicide x Time | **0.020** | **0.025** |
| Frozen events | Larvicide | 0.355 | 0.371 |
| Frozen events | Larvicide x Time | 0.439 | 0.682 |
| Mobility rate | Larvicide | 0.627 | 0.932 |
| Mobility rate | Larvicide x Time | 0.060 | 0.125 |
| Exploration rate | Larvicide | **0.003** | **0.004** |
| Exploration rate | Larvicide x Time | **<0.001** | **<0.001** |


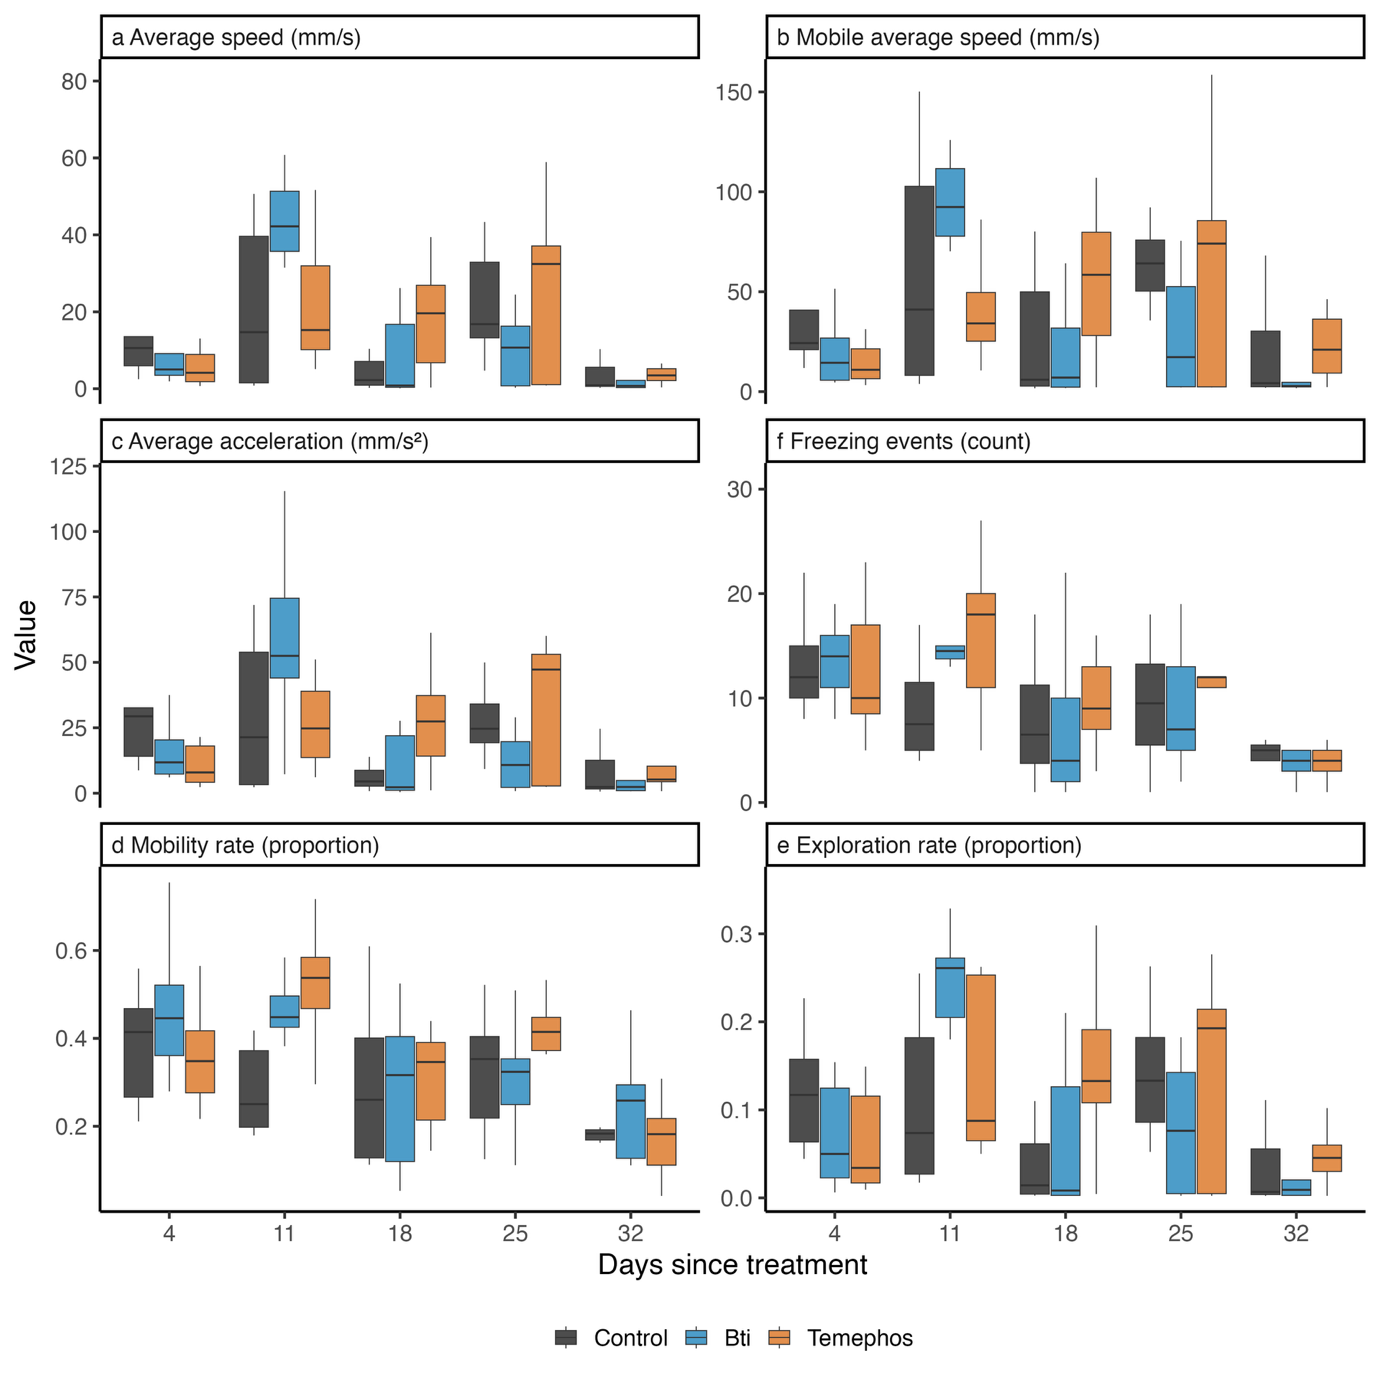


**Fig. S1.** Impacts of mosquito larvicides at minimum recommended rates on movement parameters (average acceleration, average speed, exploration rate, freezing events, mobile average speed, and mobility rate) of *Liuixalus romeri* tadpoles at 4, 11, 18, 25, and 32 days since exposure. Treatments include *Bacillus thuringiensis israelensis* (Bti), temephos, and a control. Movement was analysed using ToxTrac.
